# Supplementary material
Source: MDPI journal article supplement (https://www.mdpi.com/2073-4441/11/7/1437)
Supplement: s1 [file s1]

# Supplementary Materials: Pretreatment Techniques for Produced Water with Subsequent Forward Osmosis Remediation

Tiffany Liden <sup>1</sup>, Zacariah L. Hildenbrand <sup>2,3</sup> and Kevin A. Schug <sup>1,2,\*</sup>

<sup>1</sup> Department of Chemistry and Biochemistry, The University of Texas at Arlington, 700 Planetarium Place, Arlington, TX 76019, USA; tiffany.liden@mavs.uta.edu

<sup>2</sup> Collaborative Laboratories for Environmental Analysis and Remediation, The University of Texas at Arlington, Arlington, TX 76019, USA; zac@informenv.com

<sup>3</sup> Inform Environmental, LLC, 6060 N. Central Expressway, Suite 500, Dallas, TX 75206, USA

\* Correspondence: kschug@uta.edu; Tel.: +1-817-272-3541; Fax: +1-817-272-3808

## Supplemental Information

Equation S1 for Standardized Fouling Index (SFI):

$$\text{Standardized fouling index(\%)} = \left( 1 - \left( \frac{\text{baseline flux after washing}}{\text{initail baseline flux}} \right) \right) \times 100$$

**Table S1.** Analytical parameters measured for the 100 mL of treated PW.

| Component                    | TOC (mg/L) | pH   | Turbidity (NTU) |
|------------------------------|------------|------|-----------------|
| Centrifuge                   | 16.9 ± 0.4 | 7.00 | 24 ± 2          |
| Activated Carbon             | 1.6 ± 0.4  | 7.28 | 17.4 ± 0.4      |
| Filtration                   | 17.1 ± 0.6 | 7.46 | 85 ± 7          |
| FeCl <sub>3</sub>            | 10.4 ± 0.2 | 1.68 | 530 ± 70        |
| UltraPAC 261                 | 16.3 ± 0.4 | 5.19 | 67 ± 17         |
| UltraPAC 2346                | 15.4 ± 0.5 | 6.79 | 56 ± 4          |
| UltraPAC 1145                | 14.9 ± 0.2 | 3.95 | 74 ± 3          |
| UltraPAC 560 CV              | 25 ± 1     | 7.06 | 40± 10          |
| UltraPAC 261 & UltraPAC560CV | 18.5 ± 0.7 | 7.11 | 24.9 ± 0.6      |

**Table S2.** The reported flux and reverse solute flux (RSF) from the manufacturer with using FS of DI water and 3.5% NaCl DS. The initial baseline flux, the average flux during the first hour of the 7 h trial, as well as the % decrease over the trial. Finally, for comparison purposes the baseline after FO trials, and baseline after washing module for 1 hr with DI water is recorded along with the module performance and standard fouling index is also provided for FO trial using pretreated PW as the FS.

| Component                     | Manufacture Reported |       | Baseline Flux (LMH) | Initial Flux Average over 1st h | % Flux Decrease over 7 h Trial | Baseline Flux after FO Trial (LMH) | Baseline Flux after Washing (LMH) | Module Performance After FO Trial | Standardized Fouling Index (SFI) * |
|-------------------------------|----------------------|-------|---------------------|---------------------------------|--------------------------------|------------------------------------|-----------------------------------|-----------------------------------|------------------------------------|
|                               | Flux                 | RSF   |                     |                                 |                                |                                    |                                   |                                   |                                    |
| Centrifuge                    | 15.16                | 3.33  | 11.6                | 9.7                             | 12%                            | 13.3                               | 11                                | 115%                              | 5%                                 |
| Activated Carbon              | 14.44                | 2.20  | 12.0                | 11.9                            | 14%                            | 13.7                               | 12.6                              | 114%                              | -5%                                |
| Filtration                    | 14.73                | 1.878 | 14.6                | 13.1                            | 79%                            | -2.4                               | 15.4                              | -16%                              | -5%                                |
| UltraPAC 2346                 | 14.88                | 2.86  | 12.2                | 10.8                            | 2%                             | 2.2                                | 9.2                               | 18%                               | 25%                                |
| UltraPAC 261 & UltraPAC 560CV | 15.15                | 1.86  | 13.3                | 11.9                            | 4%                             | 1.2                                | 9.2                               | 9%                                | 31%                                |

\* Negative SFI indicates an improvement in module performance.
